# Supplementary material
Source: publisher figshare collection journal article supplement (https://brill.figshare.com/articles/dataset/_/8229137)
Supplement: Supplementary file 1 [file 1]

**Proteomic analysis of differently expressed proteins in sex differentiation phases of flower buds in monoecious *Pistacia chinensis* Bunge**

Yifan Chen, Qian Bai, Funan Ruan and Shuchai Su \*

Ministry of Education Key Laboratory of Silviculture and Conservation, College of Forestry, Beijing Forestry University, 35 East Qinghua Road, Beijing, 100083, China

**CONTACT** Shuchai Su @ [sushuchai@sohu.com](mailto:sushuchai@sohu.com)

**Supplemental material**

**Table S1.** Complete list of identified proteins (.xls).
